# Supplementary material for: Effect of fullerenol surface chemistry on nanoparticle binding-induced protein misfolding
Source: Royal Society of Chemistry journal article supplement (doi:10.1039/c4nr01544d), 2014-01-01
Supplement: c4nr01544d1.pdf [file c4nr01544d1.pdf]

## Supporting Information

### Effect of Fullerenol Surface Chemistry on Nanoparticle Binding-induced Protein Misfolding

Slaven Radic<sup>1,\*</sup>, Praveen Nedumpully-Govindan<sup>1,2,\*</sup>, Ran Chen<sup>1</sup>, Emppu Salonen<sup>2</sup>, Jared M. Brown<sup>3</sup>, Pu Chun Ke<sup>1</sup>, and Feng Ding<sup>1</sup>

<sup>1</sup>Department of Physics and Astronomy, Clemson University, Clemson, SC 29634, USA

<sup>2</sup>Department of Applied Physics, Aalto University, FI-00076 Aalto, Finland

<sup>3</sup>Department of Pharmaceutical Sciences, Skaggs School of Pharmacy, University of Colorado Anschutz Medical Campus, Aurora, CO 80045, USA

\*These authors contributed equally

Address correspondence to: [fding@clemson.edu](mailto:fding@clemson.edu)

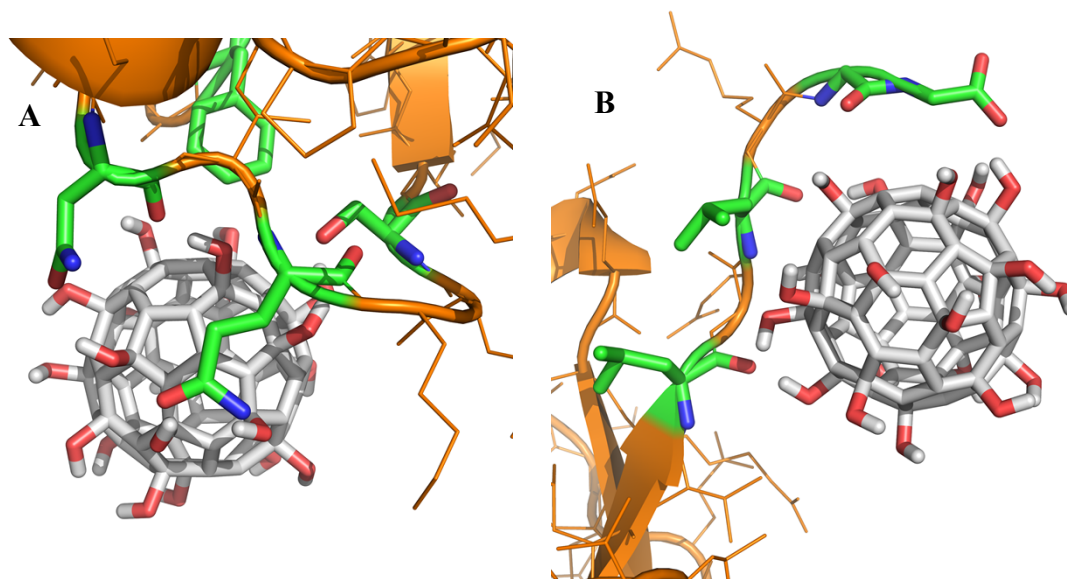

**Figure S1.** The binding sites of  $C_{60}(OH)_{20}$  fullerene on ubiquitin as predicted by docking simulations. The residues that make direct contact with ubiquitin include Phe45, Asn60, Gln 62 and Ser65 at site 1 (A), and Leu71, Leu73, Gly75 and Gly76 at site 2 (B), which are highlighted by depicting in stick representation. The  $C_{60}$  fullerene bind predominantly to site 1.

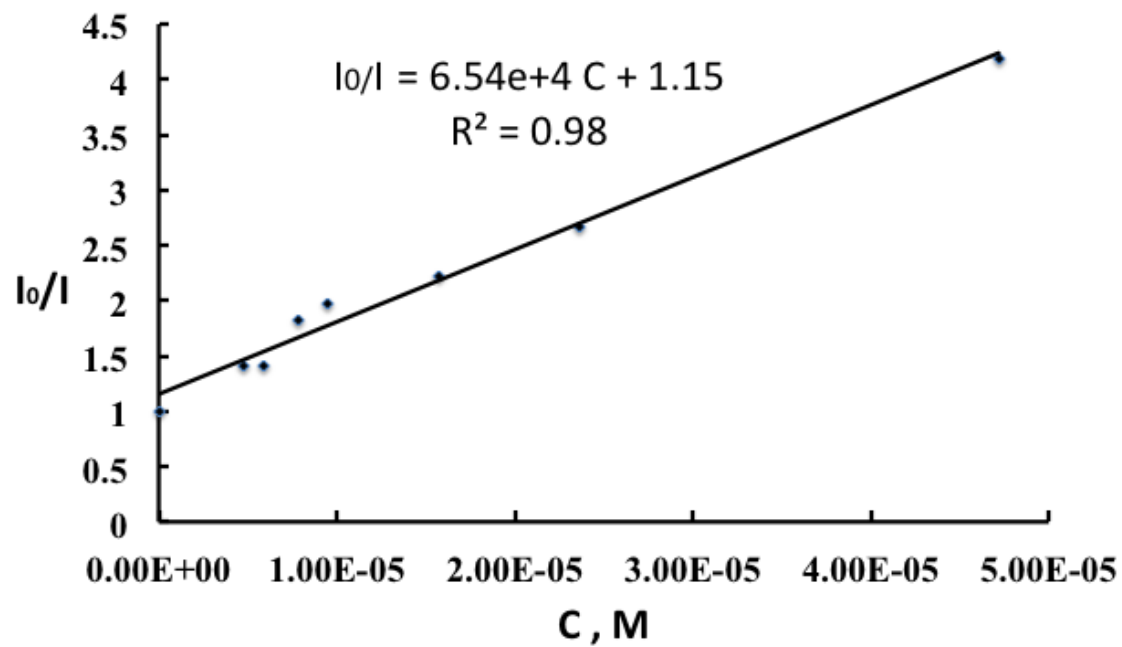

**Figure S2.** Stern-Volmer plot of fluorescence quenching of ubiquitin in the presence of fullereneol  $C_{60}(OH)_{20}$ .

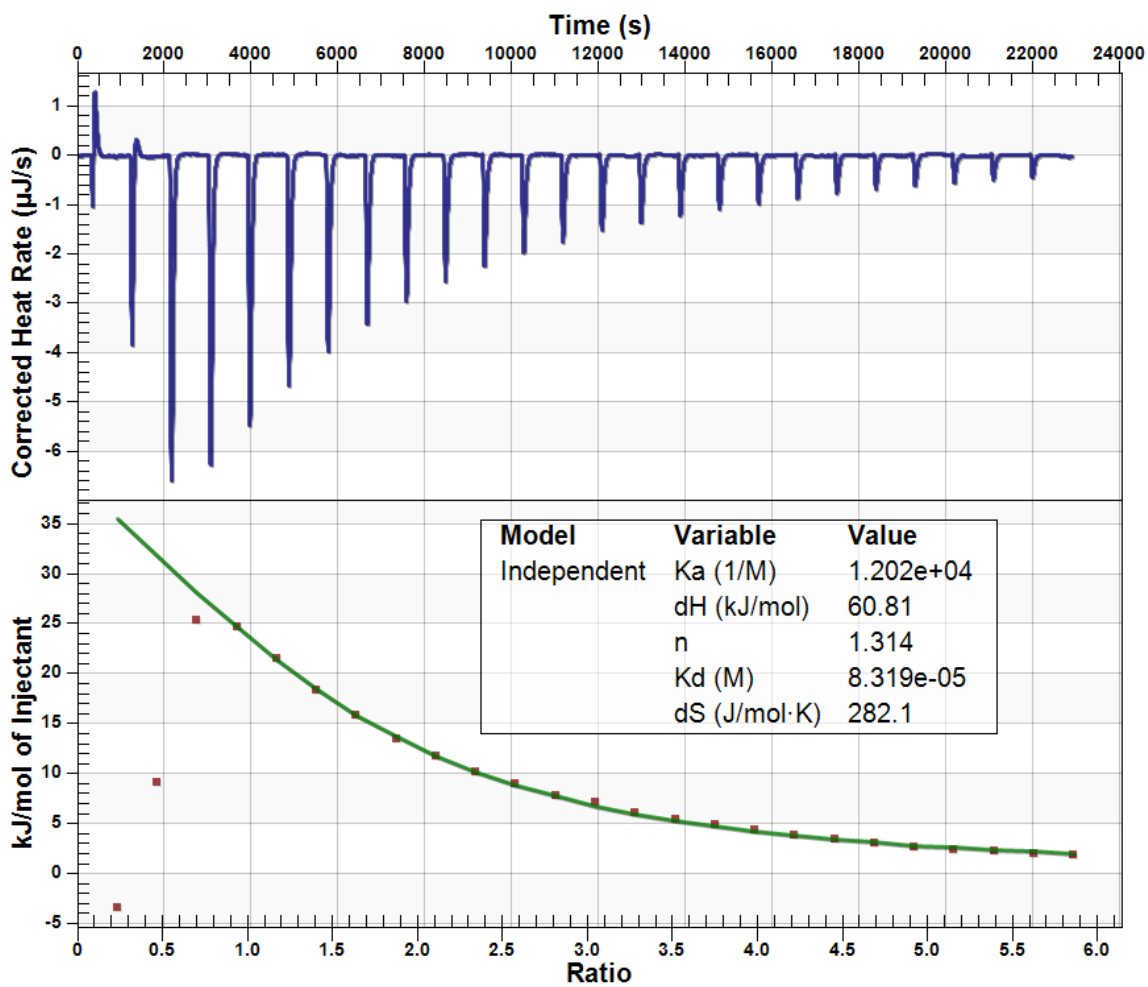

Figure S3. Isothermal titration calorimetry of  $C_{60}(\text{OH})_{20}$  fullereneol into ubiquitin.

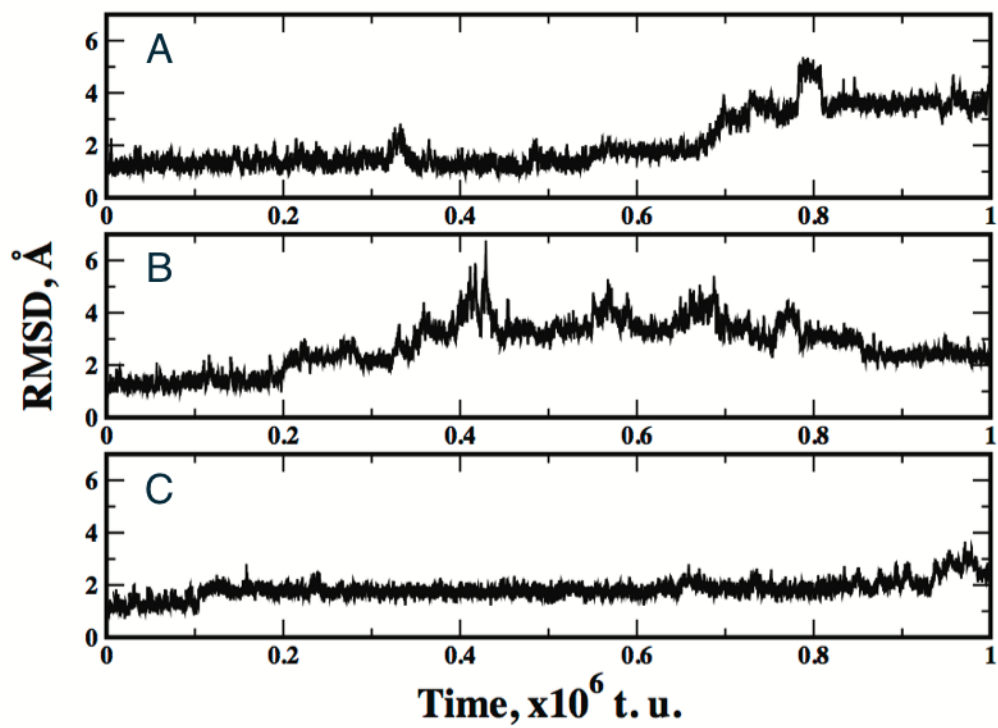

**Figure S4.** Representative RMSD plots of ubiquitin without any nanoparticles from DMD simulations. The three trajectories (A-C) are taken from three independent simulations.

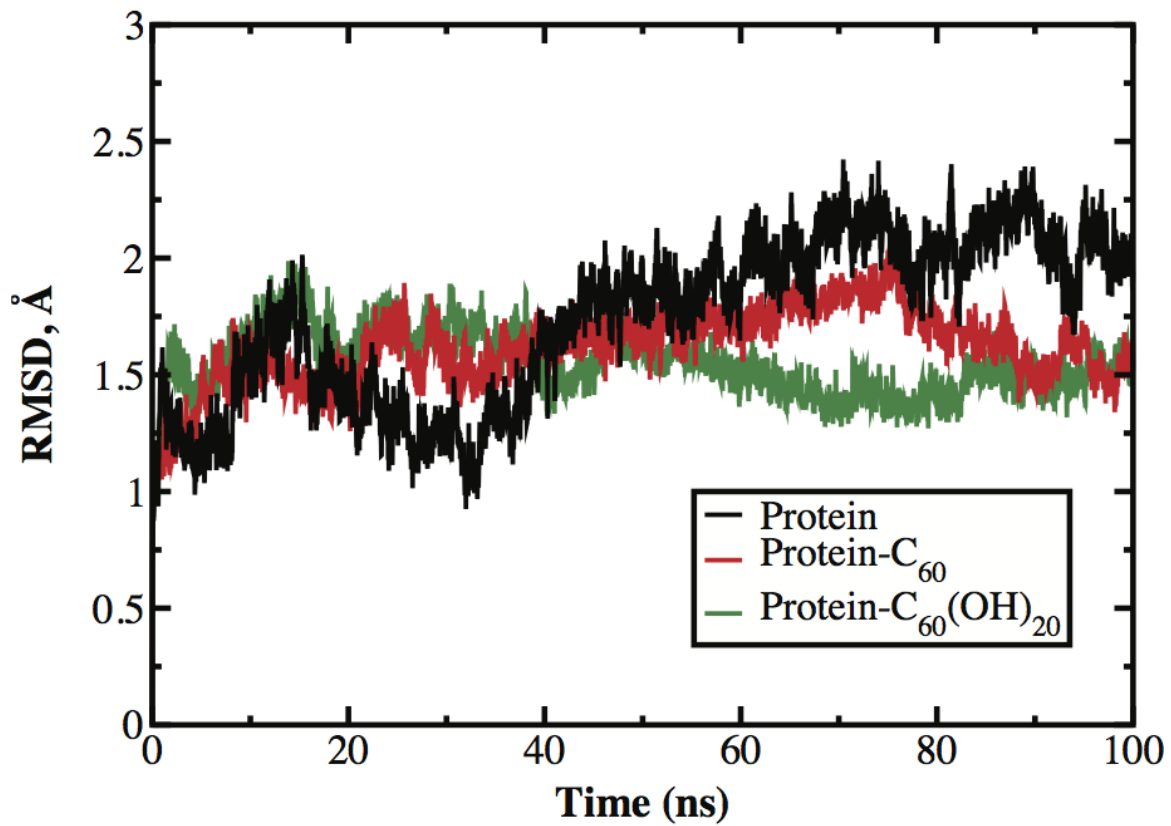

**Figure S5.** Protein heavy atom RMSD fluctuations in MD simulations in the cases of ubiquitin-alone (black), ubiquitin with C<sub>60</sub> fullerene (red) and ubiquitin with C<sub>60</sub>(OH)<sub>20</sub> fullerenol (green).

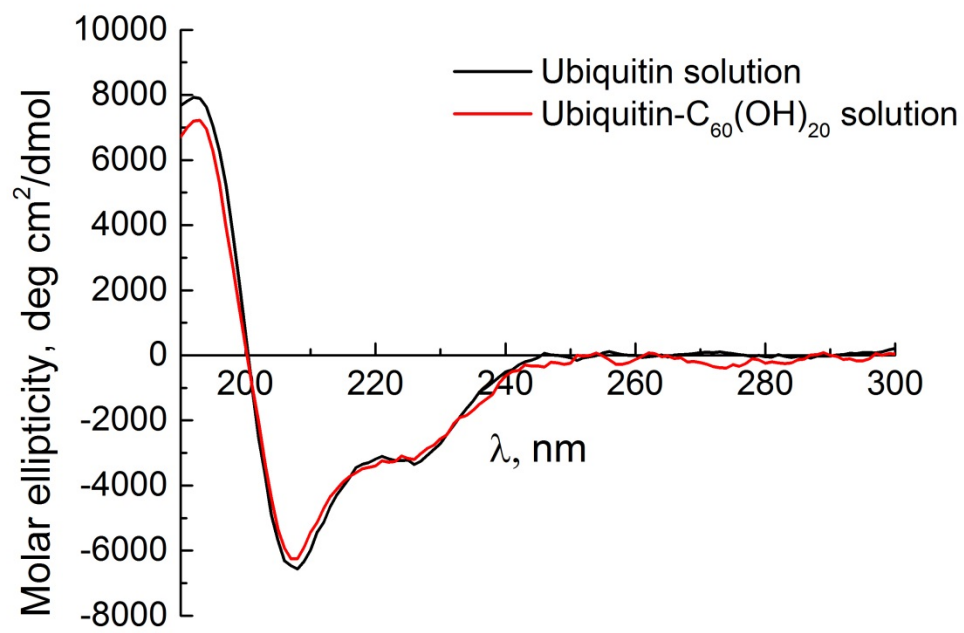

**Figure S6.** Circular dichroism spectra of ubiquitin and ubiquitin-fullerenol solutions.
